# Supplementary material for: The draft genome of the carcinogenic human liver fluke Clonorchis sinensis
Source: Springer Nature journal article supplement (doi:10.1186/gb-2011-12-10-r107), 2011-10-24
Supplement: Additional file 7 [file gb-2011-12-10-r107-s7.doc]

The resources of gene sets used for comparative analysis

| **Species** | **Source** |
| --- | --- |
| ***Homo sapiens*** | **[80]** |
| ***Gallus gallus*** | **[80]** |
| ***Danio rerio*** | **[80]** |
| ***Drosophila melanogaster*** | **[80]** |
| ***Anopheles gambiae*** | **[82]** |
| ***Caenorhabditis elegans*** | **[80]** |
| ***Clonorchis sinensis*** | **this study** |
| ***Schistosoma mansoni*** | **[83]** |
| ***Schistosoma japonicum*** | **[84]** |
